# Supplementary material
Source: PubMed Central journal article supplement (PMC2755861)
Supplement: supp_M109.027433_jbc.M109.027433-1.pdf [file supp_M109.027433_jbc.M109.027433-1.pdf]

# Supplementary Figure 1

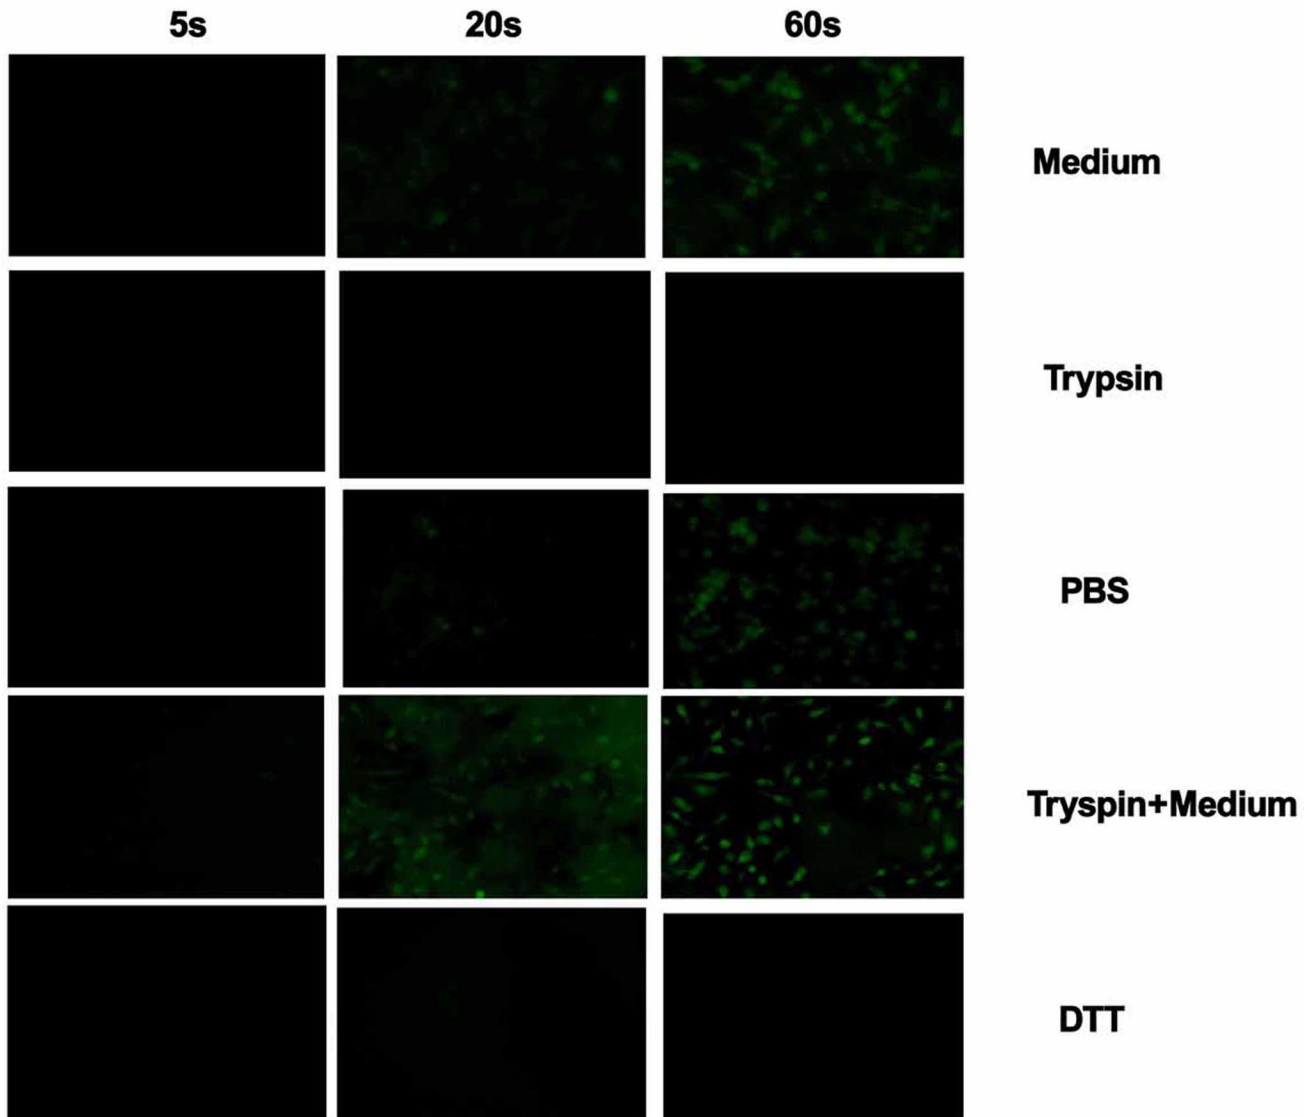

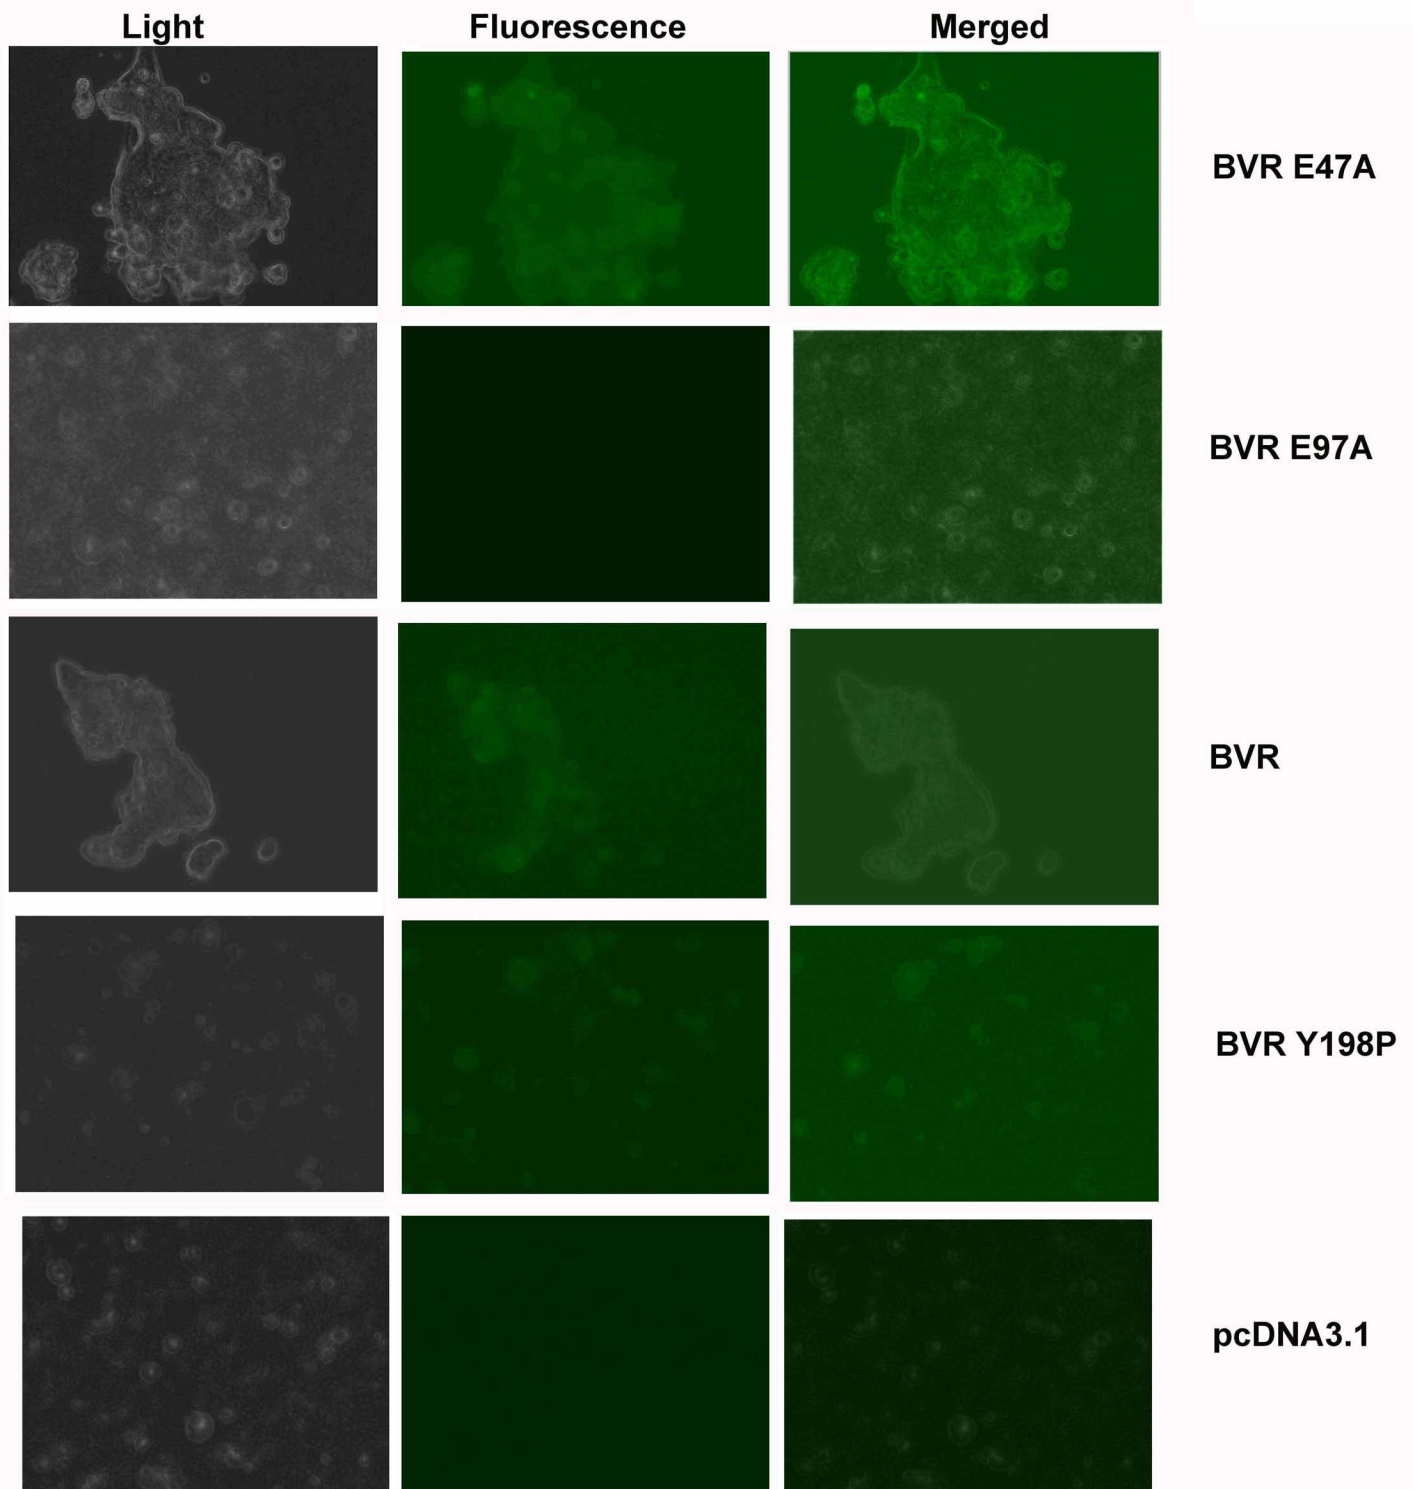

## BVR mutants and their effect on BV-induced Akt signaling

1) BVR wt

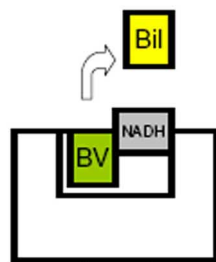

P-Akt

2) E97A  
Catalytically inactive

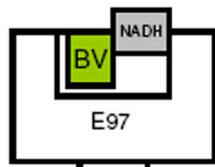

P-Akt

3) Y198P  
Unable to bind PI3K

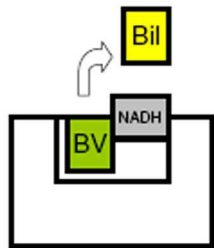

P-Akt

3) E47A  
Unstable binding of BV/NADH

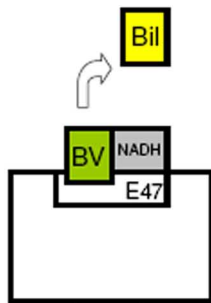

P-Akt
